# Supplementary material for: Niacin restriction with NAMPT-inhibition is synthetic lethal to neuroendocrine carcinoma
Source: PubMed Central journal article supplement (PMC10719245; doi:10.1038/s41467-023-43630-3), 2023-12-13
Supplement: 41467_2023_43630_MOESM3_ESM.pdf [file 41467_2023_43630_MOESM3_ESM.pdf]

## **Description of Additional Supplementary Files**

### Supplementary Data 1

Description: qRT-PCR analyses were performed using both sense and anti-sense primers in combination with TaqMan probes from a universal probe library (UPL) obtained from Roche. Alternatively, assays were done using primers and TaqMan probe provided in the TaqMan Gene Expression Assay kit from Thermo Fisher.
